# Supplementary material for: Pyridinic-nitrogen highly doped nanotubular carbon arrays grown on a carbon cloth for high-performance and flexible supercapacitors
Source: Royal Society of Chemistry journal article supplement (doi:10.1039/c7nr07414j), 2018-01-01
Supplement: c7nr07414j1.pdf [file c7nr07414j1.pdf]

## **Supporting Information**

### **Pyridinic-Nitrogen-Highly Doping Nanotubular Carbon Arrays Grown on Carbon Cloth for High Performance and Flexible Supercapacitors**

Rui Li,<sup>a,+</sup> Xiaodong Li,<sup>a,+</sup> Jin Chen,<sup>a</sup> Jun Wang,<sup>a</sup> Huichao He,<sup>b</sup> Bing Huang,<sup>a</sup>  
Yousong Liu,<sup>a</sup> Yong Zhou,<sup>\*bc</sup> and Guangcheng Yang<sup>\*a</sup>

*<sup>a</sup>Institute of Chemical Materials, China Academy of Engineering Physics,  
Mianyang 621900, China. E-mail: ygcheng@caep.cn*

*<sup>b</sup>State Key Laboratory of Environmental Friendly Energy Materials, School of  
Materials Science and Engineering, Southwest University of Science and  
Technology, Mianyang 621010, Sichuan, P. R. China. E-mail:  
zhouyong1999@nju.edu.cn*

*<sup>c</sup>School of Physics, Nanjing University, Nanjing 211102, Jiangshu, P. R. China.*

*<sup>+</sup>These authors contributed equally to this work.*

**Section S1:** Calculation of the electrochemical capacitance:

For three electrode cells, the specific capacitance of electrodes ( $C_m$ ) were calculated with the previously reported methods [1, 2]:

(1) From GCD test by

$$C_m = It/\Delta EM,$$

where  $I$ ,  $M$ ,  $t$  and  $\Delta E$  are the constant current (A), mass of the active material (g) of the electrode, the discharge time (s) and the voltage window (V), respectively.

(2) From CV test by

$$C_m = S/2Mv\Delta E,$$

where  $S$ ,  $M$ ,  $v$  and  $\Delta E$  are the loop area, mass of the active material (mg) of the electrode, the scan rate (mV/s) and the voltage window (V), respectively.

For symmetrical cell, the specific capacitance of electrodes ( $C_m$ ) were calculated from GCD test by  $C_m = 2It/\Delta EM$ , where  $M$  is the active materials of both electrodes and 2 results from serial connection of two identical capacitors.

The energy density ( $E$ ) and power density ( $P$ ) of the symmetrical SCs is obtained with

$$E = C_m \Delta E^2 / 4 \times 3600,$$

$$P = 3,600 \times E / t,$$

$$C_m = 2It/\Delta EM,$$

from GCD test, where  $t$  is the discharge time,  $\Delta E$  represents the potential window,  $M$  represent the mass of the two electrodes.

**Section S2:** Calculation of the fraction of  $sp^2$  bonding

First, the background of the carbon K-edge spectra caused by the tails of the plasmon peak(s) and other core - loss edges were removed by fitting the pre-edge region with a power law:

$$I_{BG} = A \times E^{-r}$$

and then determining  $A$  and  $r$  and extrapolating it to the carbon K-edge region.

Second, the carbon K-edge spectra after removal of the background were normalized by the intensity at about 298 eV and were aligned at the  $\pi^*$  peak (285.5 eV) for energy calibration [3].

Third, the fraction of  $sp^2$  bonding was then calculated using the quantitative technique of Berger et al. [4] with reference to graphite (100%).

**Table S1.** Summarization of N concentration (atomic percent of nitrogen with respect to carbon and nitrogen) and ratios of N-6, N-5 and N-Q to the total N in the corresponding materials.

| Materials | N content<br>(N/(N+C) (%)) | Ratio of N-6<br>(%) | Ratio of N-5<br>(%) | Ratio of N-Q<br>(%) |
|-----------|----------------------------|---------------------|---------------------|---------------------|
| NTC-650   | 19.0                       | 68.98               | 20.75               | 10.27               |
| NTC-700   | 14.3                       | 69.12               | 18.4                | 12.47               |
| NTC-750   | 11.7                       | 60.16               | 14.7                | 25.13               |
| NTC-800   | 10.3                       | 59.84               | 13.4                | 26.72               |
| NTC-1000  | 3.4                        | 31.31               | 6.50                | 62.19               |

**Table S2.** Summarization of the N content and N-6 ratio for hollow carbons materials, N doped carbon nanotubes (N-CNT) and N doped graphene and other type of carbon materials ever reported in previous literatures.

|                        | Materials                          | Method                                   | N content       | Ratio of N-6 to total N content | Application                      | Specific capacitance    | Ref.                                                             |
|------------------------|------------------------------------|------------------------------------------|-----------------|---------------------------------|----------------------------------|-------------------------|------------------------------------------------------------------|
| Hollow carbons         | NTC arrays                         | PVD and carbonization                    | 14.3% (700 deg) | 69.12%                          | supercapacitors                  | 310.7 F g <sup>-1</sup> | This work                                                        |
|                        | Nitrogen-Doped hollow spheres      | hard template                            | 7.92%           | <50%                            | Li-S batteries & supercapacitors | 201 F g <sup>-1</sup>   | Nature Communications 2015, <b>6</b> , 7221.                     |
|                        | Nitrogen-Doped hollow spheres      | hard template                            | 1.61%           | <50%                            | Li-S batteries                   |                         | Adv. Energy Mater. 2015, 1402263                                 |
|                        | microporous hollow carbon          | hard template                            | 5.2%            | 44.2%                           | Li-S batteries                   |                         | Adv. Funct. Mater. <b>2007</b> , <i>17</i> , 1828–1836           |
|                        | hollow carbon arrays               | hard template                            | 3.8%            | <50%                            | -                                |                         | Carbon 2015, <b>83</b> , 275-281.                                |
|                        | Nitrogen doped carbon nanocapsules | hard template                            | 7.1%            | 27.6%                           | ORR                              |                         | Chemical Communications 2011, <b>47</b> , 4463-4465.             |
|                        | Nitrogen-Doped Carbon Nanotubes    | carbonization of polypyrrole             | 4.56%           | <50%                            | supercapacitors                  | 210 F g <sup>-1</sup>   | Chemistry–A European Journal 2013, <b>19</b> , 12306.            |
|                        | N doped hollow microspheres        | hard template                            | 9.63%           | 16.8%                           | Li ion batteries                 |                         | ACS Appl. Mater. Interfaces 2014, <b>6</b> , 19082               |
|                        | N-doped hollow carbon microspheres | carbonization                            | 9.08%           | <50%                            | Li-S batteries                   |                         | J. Mater. Chem. A, 2016, <b>4</b> , 15612                        |
|                        | N-doped Hollow Mesoporous Carbon   | hard template                            | 4.05%           | <30%                            | Dye-Sensitized Solar Cells       |                         | J. Phys. Chem. C 2014, <b>118</b> , 16694                        |
| N-CNTs                 | nitrogen-doped carbon nanocages    | hard template CVD                        | 9.7% (700deg)   | 30.9%                           | ORR                              |                         | Adv. Mater. 2012, <b>24</b> , 5593–5597                          |
|                        | N-CNTs                             | CVD                                      | 0.85%           | 35%                             |                                  |                         | Carbon 2013, <b>52</b> , 316-325.                                |
|                        | N-CNTs                             | CVD                                      | 8.4%            | ~24%                            |                                  |                         | Carbon 2010, <b>48</b> , 1498-1507.                              |
|                        | N-CNTs                             | CVD                                      | 1.5-5.1%        | 33-21.5%                        | supercapacitors                  | 18 F g <sup>-1</sup>    | Phys. Status Solidi B 2013, <b>250</b> , 2586                    |
|                        | N-CNTs                             | CVD                                      | 3.6%            | 33.7%                           |                                  |                         | Journal of Materials Science 2017, <b>52</b> , 10751-10765.      |
| N doped graphene       | N-CNTs                             | CVD                                      | 6%              | <50%                            |                                  |                         | J. Phys. Chem. C 2013, <b>117</b> , 7811-7817                    |
|                        | N doped graphene                   | chemical etching                         | 3.5%            | ~50%                            |                                  |                         | Nanotechnology 2016, <b>27</b> , 055404                          |
|                        | N doped graphene                   | CVD post doping                          | 6.5%            | 63.1%                           | ORR                              |                         | ACS Appl. Mater. Interfaces 2015, <b>7</b> , 14763–14769         |
|                        | N doped graphene                   | CVD post doping                          | 12.2%           | 90.4%                           | ORR                              |                         | Adv. Funct. Mater. 2016, <b>26</b> , 5708–5717                   |
|                        | N doped graphene                   | plasma process                           | 1.68-2.51%      | 30-52%                          | supercapacitors                  | 280 F g <sup>-1</sup>   | Nano Lett. 2011, <b>11</b> , 2472–2477                           |
|                        | N doped oxide graphene             | hydro-thermal reaction                   | 10.0%           | 38.8%                           | supercapacitors                  | 217 F g <sup>-1</sup>   | Nanoscale Research Letters 2015, <b>10</b> , 332                 |
|                        | N doped graphene                   | CVD                                      | 7.3-8.5%        | 10.4-26.1%                      | -                                |                         | Scientific Reports 2016, <b>6</b> , 28330.                       |
| other carbon materials | N doped graphene oxide             | hydrothermal                             | 6.56%           | 28.2%                           | ORR                              |                         | International Journal of Hydrogen Energy 2017, <b>42</b> , 28298 |
|                        | N doped mesoporous carbon          | soft-templating hydrothermal approach    | 14.5%           | 50.7%                           | supercapacitors                  | 212 F g <sup>-1</sup>   | J. Mater. Chem. A, 2014, <b>2</b> , 11753                        |
|                        | N-doped carbon film                | sputtering                               | 12%             | 78%                             | -                                |                         | Chemical Communications 2014, <b>50</b> , 557-559.               |
|                        | N doped porous carbon              | KOH activation in ammonia                | 7.5%–7.8%       | 13.5%                           | Li-ion storage                   |                         | Adv. Mater. <b>2017</b> , 1603414                                |
|                        | few-layer carbon                   | CVD                                      | 8.2-11.9%       | 37.7-74.3%                      | supercapacitors                  | 855 F g <sup>-1</sup>   | Science 2015, <b>350</b> , 1508.                                 |
|                        | N-doped carbon film                | sputtering                               | 12%             | 78%                             |                                  |                         | Chemical Communications 2014, <b>50</b> , 557-559.               |
|                        | nitrogen-doped porous carbon       | Carbonization                            | 4.22%           | 37.2%                           | supercapacitors                  | 450 F g <sup>-1</sup>   | J. Solid State Electrochem. 2015, <b>19</b> , 3087               |
|                        | N doped porous Carbon              | solvation volatilization/KO H activation | 10.59%          | 30.2%                           | supercapacitors                  | 220 F g <sup>-1</sup>   | ChemElectroChem 2017, <b>4</b> , 1–9                             |
|                        | Carbon Nanogears                   | hydrothermal + carbonization             | ~26%            | 67.3%                           | Li-ion storage                   |                         | Adv. Energy Mater. 2016, <b>6</b> , 1600917                      |

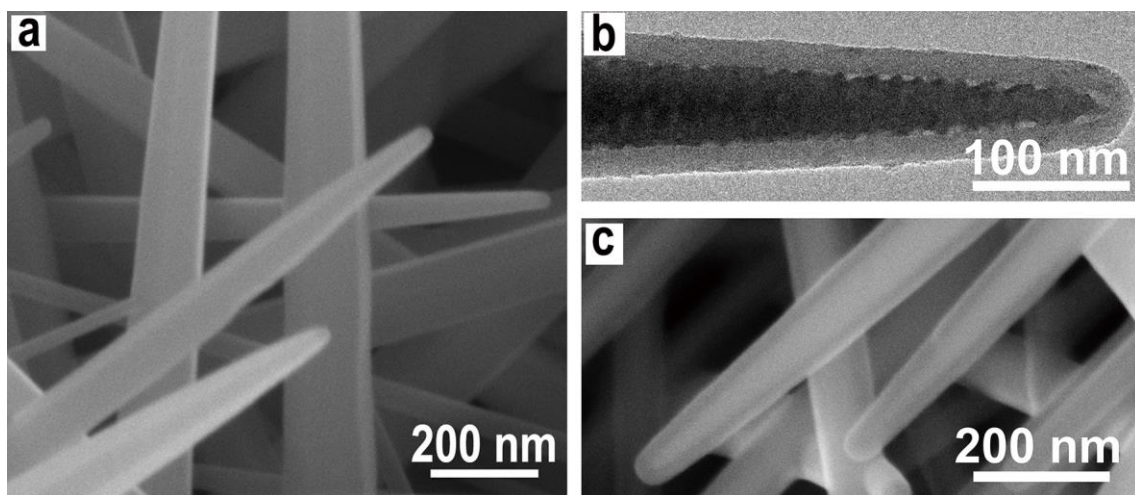

**Figure S1.** SEM (a) image of ZnO NWs. TEM (b) and SEM (c) image of the sample at 380 °C during temperature rising process.

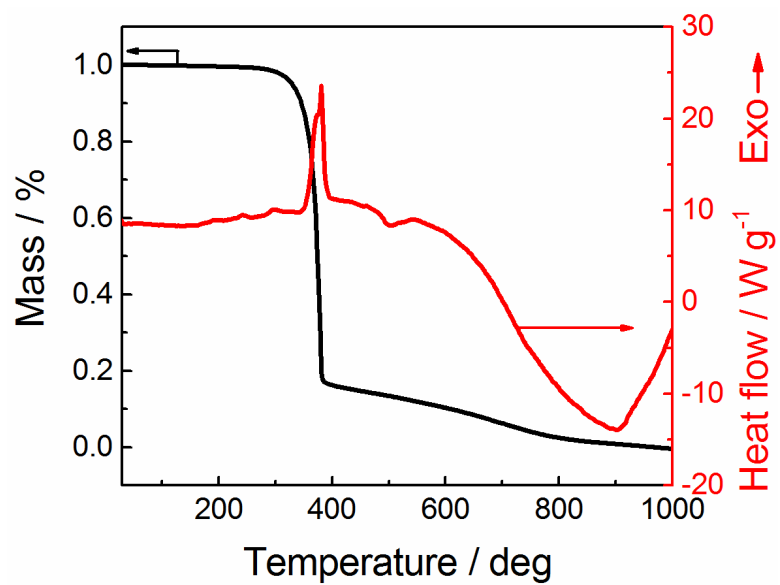

**Figure S2.** TGA and DSC curves of TATB during thermal degradation. Sample mass: 3.7 mg; Atmosphere: N<sub>2</sub>; heating rate: 10 °C/min.

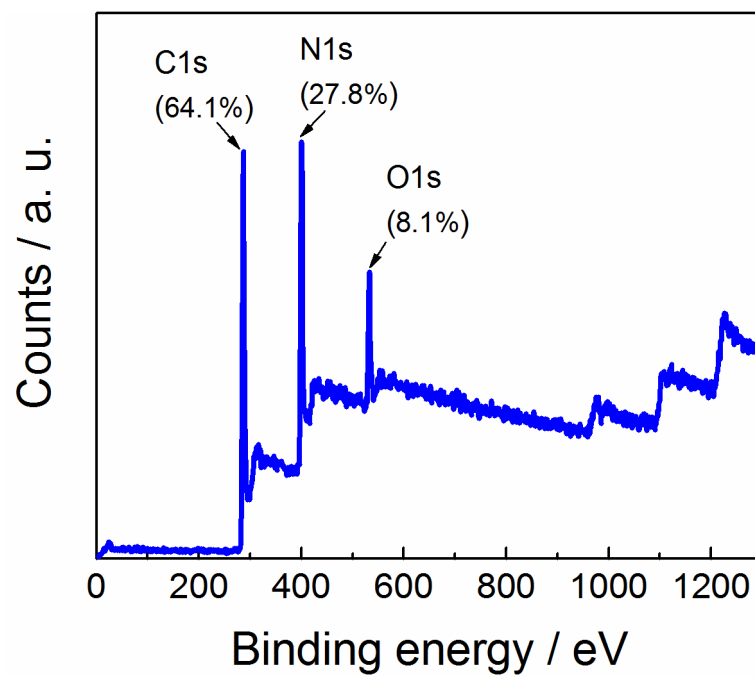

**Figure S3.** XPS of TATB after heating at 380 °C in N<sub>2</sub> atmosphere.

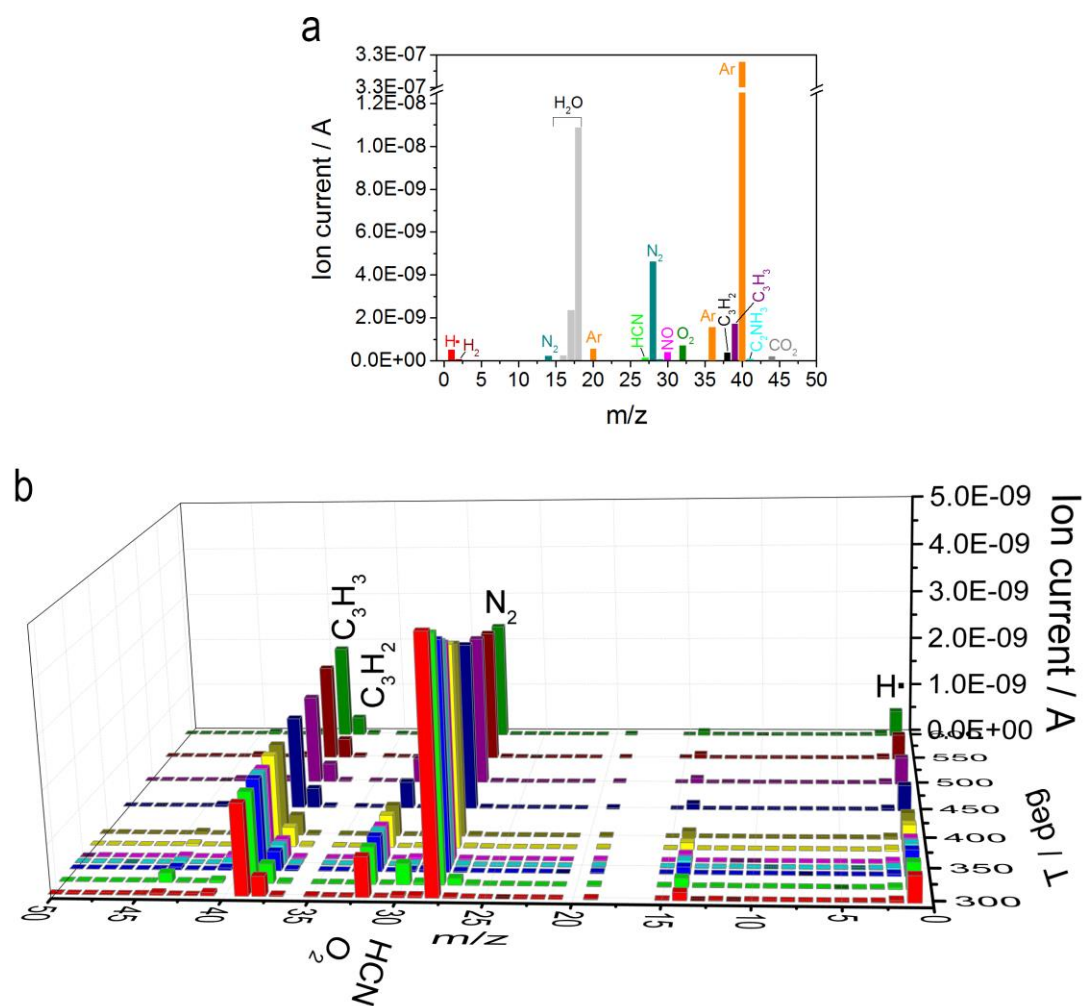

**Figure S4.** (a) Mass Spectrum showing the thermal decomposition products of TATB at 320 °C. (b) Variation of the thermal decomposition products of TATB with temperature.



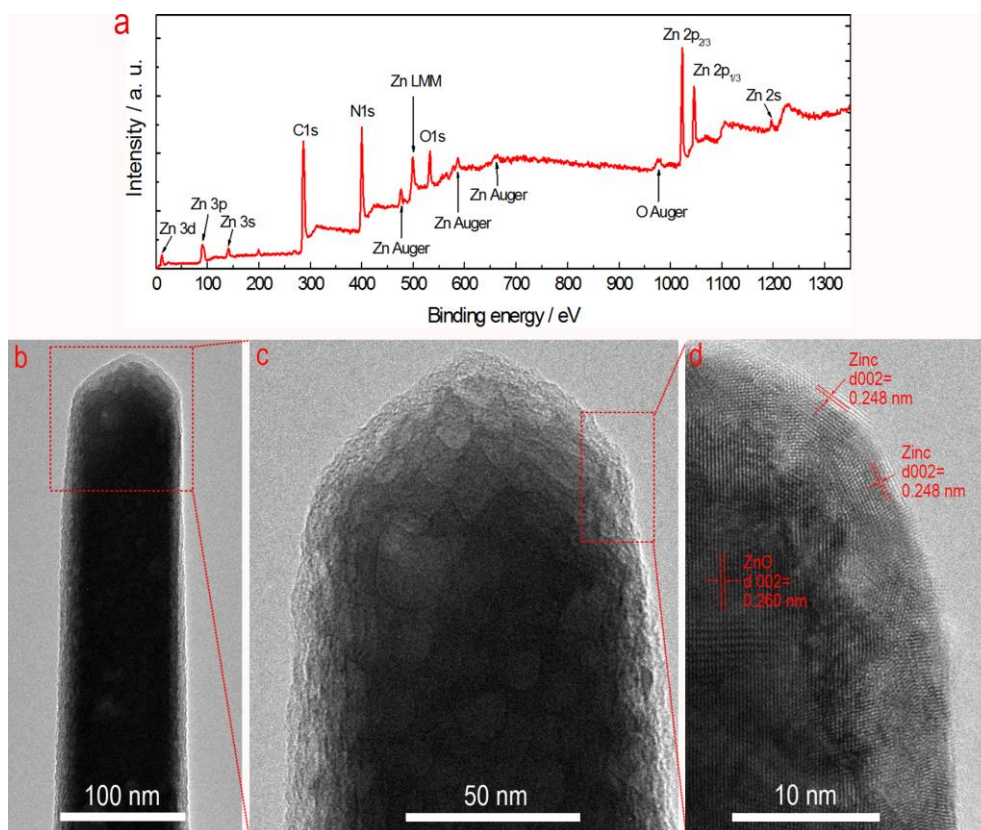

**Figure S5.** A designed confirmatory experiment demonstrated the reduction of ZnO to Zinc by the highly active thermal decomposition products of TATB. Experiment details: A piece of CC-ZnO was heated in a tube furnace with TATB powder as source under the flow of high-purity N<sub>2</sub> at 410 °C for 1 h. (a) XPS shows the elements in the sample; (b) and (c) TEM images show the presence of an amorphous layer on ZnO NW; (d) High resolution TEM image shows the existence of nanocrystalline Zinc under electron beam irradiation during the HRTEM measurement.

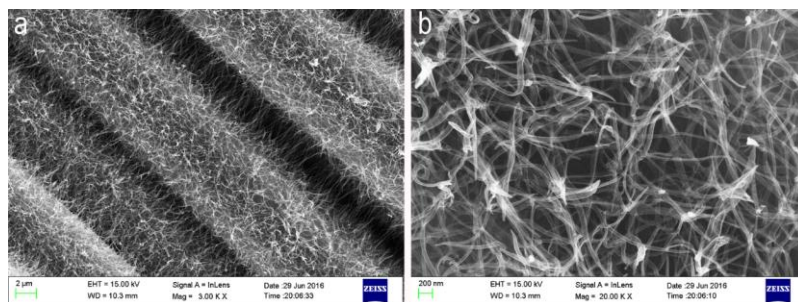

**Figure S6.** The NHCNWs synthesized under pure  $N_2$  atmosphere using TATB as the only source and ZnO NWs as self-sacrificial templates at 700 °C for 1h with a heating rate of 3 °C/min. This result demonstrates that the ZnO templates can be removed by the decomposition products of TATB without  $H_2$  within the atmosphere.

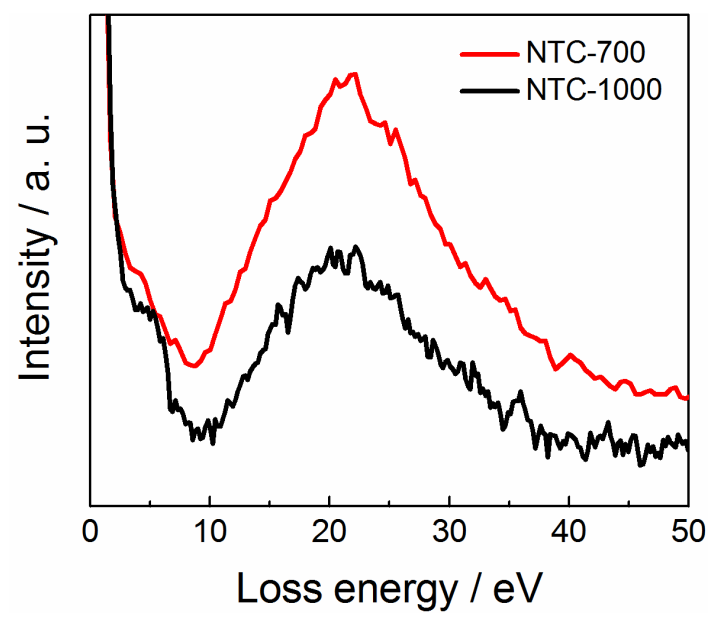

**Figure S7.** Electron energy-loss spectra in low-loss region from NTC-700 and NTC-1000.

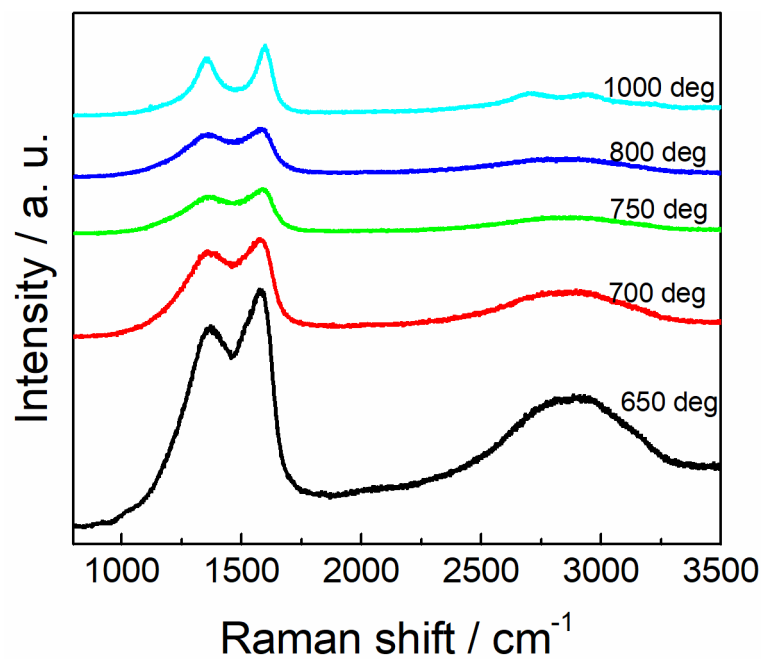

**Figure S8.** Raman scattering spectroscopy of the NTCs carbonized at different temperature. For Raman scattering spectroscopy test, the NTCs were take off from the carbon cloth by ultrasonic treatment of the samples immersed in ethanol. A NTCs film was fabricated on quartz glass substrate by dipping coating of the above suspension of NTCs.

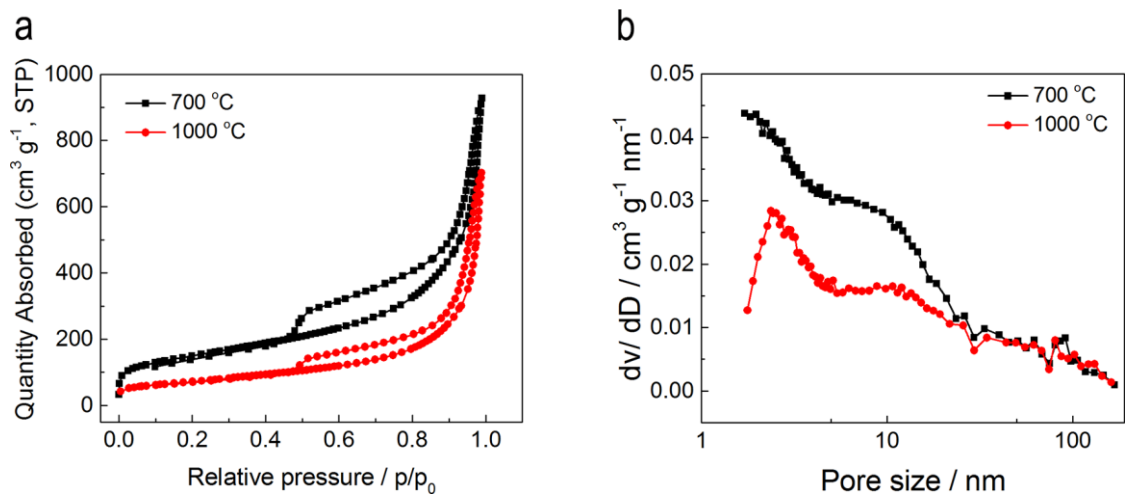

**Figure S9.** (a)  $N_2$  adsorption/desorption isotherms and (b) pore-size distribution curves of the NTC-700 and NTC-1000.

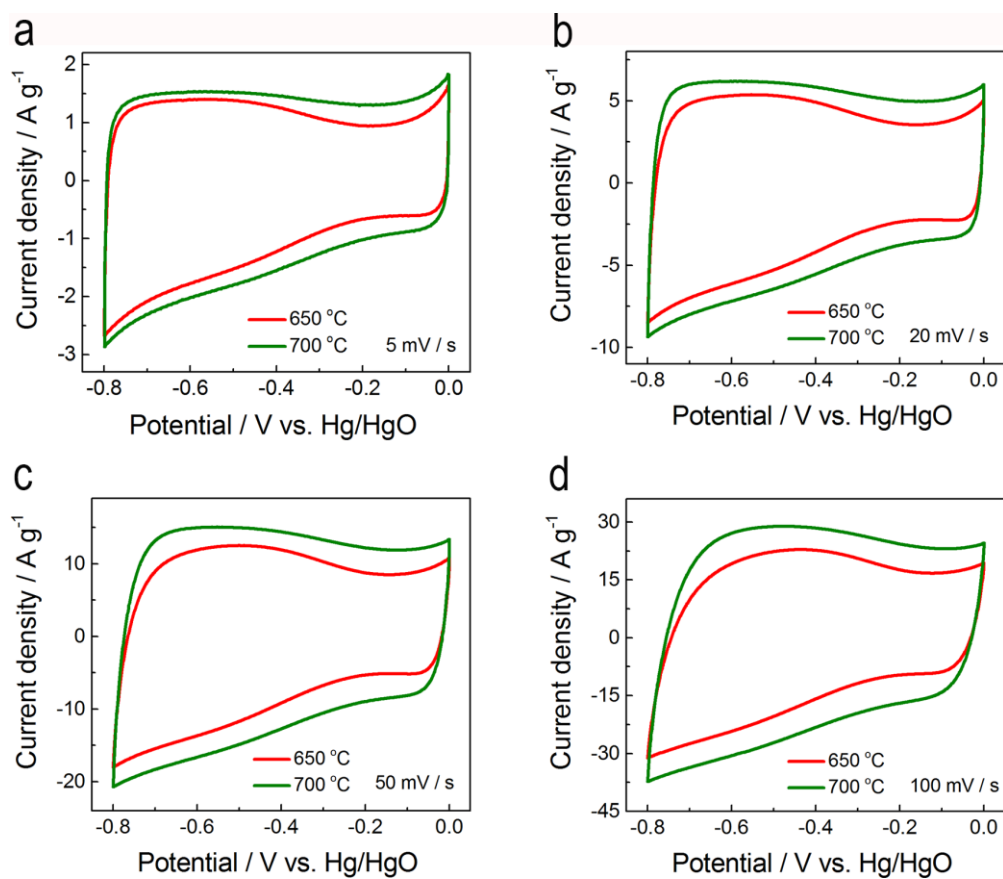

**Figure S10.** CV curves of the cells with NTC-650 and NTC-700 as working electrodes at different scan rates: (a) 5 mV/s; (b) 20 mV/s; (c) 50 mV/s and (d) 100 mV/s.

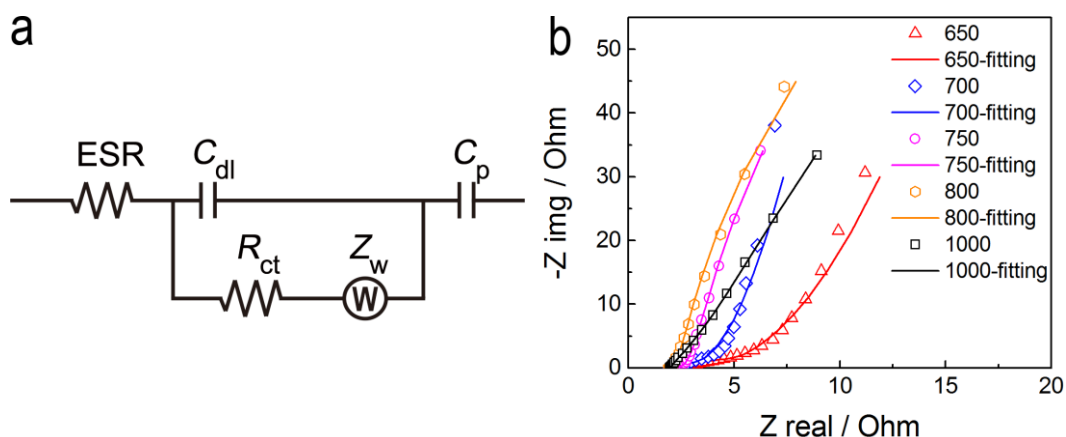

**Figure S11.** (a) Equivalent circuit used for fitting the EIS data, which comprised of equivalent series resistance (ESR), charge transport resistance ( $R_{ct}$ ), EDL capacitance ( $C_{dl}$ ), Warburg impedance ( $Z_w$ ), and pseudocapacitance ( $C_p$ ). (b) Nyquist plot of the electrode materials carbonized at different temperatures and the corresponding fitting curves obtained with the ZSimDemo version 3.30 d software (EChem Software, Ann Arbor, MI, USA).

**Table S3.** The fitted parameters of the Nyquist plots of NTC-650, NTC-700, NTC-750, NTC-800 and NTC-1000 using the equivalent circuit shown in Figure S10.

| Circuit parameters                   | NTC-650   | NTC-700  | NTC-750  | NTC-800  | NTC-1000 |
|--------------------------------------|-----------|----------|----------|----------|----------|
| $R_s$ (ohm)                          | 2.354     | 2.081    | 2.118    | 1.988    | 1.998    |
| $C_{dl}$ (F)                         | 0.0002496 | 0.003453 | 0.006469 | 0.01665  | 0.01954  |
| $R_{ct}$ (ohm)                       | 1.134     | 0.9913   | 0.1814   | 0.003826 | 0.001544 |
| $C_p$ (F)                            | 0.0578    | 0.06232  | 0.05063  | 0.03981  | 0.03767  |
| $Z_w$ ( $\Omega$ s <sup>-0.5</sup> ) | 0.07162   | 0.2046   | 0.3771   | 0.3292   | 0.05159  |

**Table S4.** A comparison of the major characteristics of our results with some typical published data on carbon based SCs, including the specific capacitance ( $C_m$  (F g<sup>-1</sup>)/the corresponding charge-discharge current density ( $I_{CD}$  (A g<sup>-1</sup>), the  $C_m$  retention (%) /the corresponding  $I_{CD}$  increase times, Cycling retention ratio (%) / the corresponding cycling number and nitrogen content (%).

| Materials                          | $C_m$ (F g <sup>-1</sup> ) /<br>$I_{CD}$ (A g <sup>-1</sup> ) | $C_m$ retention (%) /<br>$I_{CD}$ increase times | Cycling retention (%) /<br>cycling number | N content<br>(%) | Ref. No.  |
|------------------------------------|---------------------------------------------------------------|--------------------------------------------------|-------------------------------------------|------------------|-----------|
| CC-NHCNW-700                       | 310.7 / 0.8                                                   | 93.6 / 10; 74.2 / 50                             | 106.7 / 20, 000                           | 14.3             | This work |
| N doped hollow carbon nanospheres  | 203 / 0.1                                                     | 88.6 / 10                                        | 95 / 5, 000                               | 2.55             | [5]       |
| N doped hollow carbon nanospheres  | 240 / 1                                                       | 72 / 10; 69 / 40                                 | 97.0 / 5,000                              | 2.0              | [6]       |
| N doped hollow carbon spheres      | 213 / 0.5                                                     | 61.6 / 10; 55.6 / 20                             | 91 / 5,000                                | 6.7              | [7]       |
| N doped hollow carbon spheres      | 230 / 0.5                                                     | 78.2 / 10; 67.4 / 20                             | 98 / 1,500                                | 4.73             | [8]       |
| N doped hollow carbon spheres      | 266.9 / 0.5                                                   | 86.17 / 10; 84 / 40                              | ~100 / 1,000                              | 7.4              | [9]       |
| N doped carbon nanotube            | 210 / 0.5                                                     | 74.4 / 10                                        | 99 / 5,000                                | 4.56             | [10]      |
| Hollow Carbon Nanococoons          | 220.0 / 0.5 <sup>a</sup>                                      | 86.4 / 20                                        | 98 / 1,000                                | 0                | [11]      |
| N doped porous carbon nanofibers   | 202 / 1                                                       | 86 / 10; 81.7 / 30                               | 97 / 3,000                                | 7.22             | [12]      |
| N-doped carbon nanofiber           | 223.8 / 0.5                                                   | 84.4 / 10; 78.5 / 100                            | 106 / 20,000                              | --               | [13]      |
| double-capillary carbon nanofibers | 245 / 0.5                                                     | 68 / 60                                          | 94 / 10, 000                              | 0                | [14]      |
| N-containing carbons               | 300 / 0.1                                                     | 76.6 / 40                                        | --                                        | 4.4              | [15]      |
| N doped porous carbon              | 325 / 1                                                       | 59 / 10; 44 / 40                                 | 90.2 / 5,000                              | 4.22             | [16]      |
| N doped porous carbon              | 340 / -                                                       | -                                                | 76.4 / 10, 000                            | 6.0              | [17]      |
| N doped porous carbon              | 240 / 0.5 <sup>a</sup>                                        | -                                                | 98.7 / 3,000                              | 2.2              | [18]      |
| Porous carbon nanosheets           | 257 / 0.5                                                     | 71.6 / 100                                       | 98 / 2,000                                | 0                | [19]      |
| Holey graphene frameworks          | 310 / 1                                                       | 92.7 / 10                                        | 95 / 20,000                               | 0                | [20]      |
| N doped graphene sheets            | 217 / 1                                                       | 74 / 5                                           | 82.1 / 500                                | 0                | [21]      |

<sup>a</sup> mV s<sup>-1</sup>



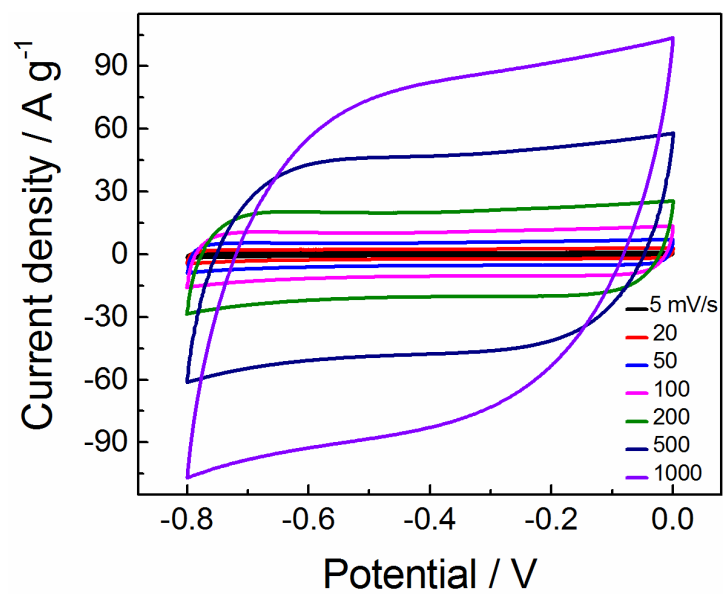

**Figure S12.** CV curves of a symmetric cell using NTC-700 at various scan rates.

## References

- [1] L. Liu, Y. Yu, C. Yan, K. Li, Z. Zheng, Wearable energy-dense and power-dense supercapacitor yarns enabled by scalable graphene-metallic textile composite electrodes, *Nat. Commun.*, 6 (2015) 7260.
- [2] T. Lin, I.-W. Chen, F. Liu, C. Yang, H. Bi, F. Xu, F. Huang, Nitrogen-doped mesoporous carbon of extraordinary capacitance for electrochemical energy storage, *Science*, 350 (2015) 1508-1513.
- [3] Y. Murooka, N. Tanaka, S. Hirono, M. Hibino, Electron Energy-Loss Spectroscopy of Carbon Films Prepared by Electron-Cyclotron-Resonance Plasma Sputtering, *Mater. Trans.*, 43 (2002) 2092-2096.
- [4] S.D. Berger, D.R. McKenzie, P.J. Martin, EELS analysis of vacuum arc-deposited diamond-like films, *Philos. Mag. Lett.*, 57 (1988) 285-290.
- [5] F. Xu, Z. Tang, S. Huang, L. Chen, Y. Liang, W. Mai, H. Zhong, R. Fu, D. Wu, Facile synthesis of ultrahigh-surface-area hollow carbon nanospheres for enhanced adsorption and energy storage, *Nat. Commun.*, 6 (2015) 7221.
- [6] C. Liu, J. Wang, J. Li, M. Zeng, R. Luo, J. Shen, X. Sun, W. Han, L. Wang, Synthesis of N-Doped Hollow-Structured Mesoporous Carbon Nanospheres for High-Performance Supercapacitors, *ACS Appl. Mater. Interfaces*, 8 (2016) 7194-7204.
- [7] J. Han, G. Xu, B. Ding, J. Pan, H. Dou, D.R. MacFarlane, Porous nitrogen-doped hollow carbon spheres derived from polyaniline for high performance supercapacitors, *J. Mater. Chem. A*, 2 (2014) 5352-5357.
- [8] X. Liu, L. Zhou, Y. Zhao, L. Bian, X. Feng, Q. Pu, Hollow, Spherical Nitrogen-Rich Porous Carbon Shells Obtained from a Porous Organic Framework for the Supercapacitor, *ACS Appl. Mater. Interfaces*, 5 (2013) 10280-10287.
- [9] H. Sun, Y. Zhu, B. Yang, Y. Wang, Y. Wu, J. Du, Template-free fabrication of nitrogen-doped hollow carbon spheres for high-performance supercapacitors based on a scalable homopolymer vesicle, *J. Mater. Chem. A*, 4 (2016) 12088-12097.
- [10] G. Xu, B. Ding, P. Nie, L. Shen, J. Wang, X. Zhang, Porous Nitrogen-Doped Carbon Nanotubes Derived from Tubular Polypyrrole for Energy-Storage Applications, *Chem. Eur. J.*, 19 (2013) 12306-12312.
- [11] J. Zhang, K. Wang, S. Guo, S. Wang, Z. Liang, Z. Chen, J. Fu, Q. Xu, One-Step Carbonization Synthesis of Hollow Carbon Nanococoons with Multimodal Pores and Their Enhanced Electrochemical Performance for Supercapacitors, *ACS Appl. Mater. Interfaces*, 6 (2014) 2192-2198.
- [12] L.-F. Chen, X.-D. Zhang, H.-W. Liang, M. Kong, Q.-F. Guan, P. Chen, Z.-Y. Wu, S.-H. Yu, Synthesis of Nitrogen-Doped Porous Carbon Nanofibers as an Efficient Electrode Material for Supercapacitors, *ACS Nano*, 6 (2012) 7092-7102.
- [13] Y. Cheng, L. Huang, X. Xiao, B. Yao, L. Yuan, T. Li, Z. Hu, B. Wang, J. Wan, J. Zhou, Flexible and cross-linked N-doped carbon nanofiber network for high performance freestanding supercapacitor electrode, *Nano Energy*, 15 (2015) 66-74.
- [14] J. Wang, J. Tang, Y. Xu, B. Ding, Z. Chang, Y. Wang, X. Hao, H. Dou, J.H. Kim, X. Zhang, Y. Yamauchi, Interface miscibility induced double-capillary carbon nanofibers for flexible electric double layer capacitors, *Nano Energy*, 28 (2016) 232-240.
- [15] L. Zhao, L.-Z. Fan, M.-Q. Zhou, H. Guan, S. Qiao, M. Antonietti, M.-M. Titirici, Nitrogen-Containing Hydrothermal Carbons with Superior Performance in Supercapacitors, *Adv. Mater.*, 22 (2010) 5202-5206.
- [16] Y. Jiang, Y. Wang, Y. Zhang, X. Shu, Z. Chen, Y.-C. Wu, Controllable synthesis and capacitive performance of nitrogen-doped porous carbon from carboxymethyl chitosan by template carbonization method, *J. Solid State Electrochem.*, 19 (2015) 3087-3096.

- [17] C.O. Ania, V. Khomenko, E. Raymundo-Piñero, J.B. Parra, F. Béguin, The Large Electrochemical Capacitance of Microporous Doped Carbon Obtained by Using a Zeolite Template, *Adv. Funct. Mater.*, 17 (2007) 1828-1836.
- [18] F. Su, C.K. Poh, J.S. Chen, G. Xu, D. Wang, Q. Li, J. Lin, X.W. Lou, Nitrogen-containing microporous carbon nanospheres with improved capacitive properties, *Energy Environ. Sci.*, 4 (2011) 717-724.
- [19] X. Zheng, W. Lv, Y. Tao, J. Shao, C. Zhang, D. Liu, J. Luo, D.-W. Wang, Q.-H. Yang, Oriented and Interlinked Porous Carbon Nanosheets with an Extraordinary Capacitive Performance, *Chem. Mater.*, 26 (2014) 6896-6903.
- [20] Y. Xu, Z. Lin, X. Zhong, X. Huang, N.O. Weiss, Y. Huang, X. Duan, Holey graphene frameworks for highly efficient capacitive energy storage, *Nat. Commun.*, 5 (2014) 4554.
- [21] B. Xie, Y. Chen, M. Yu, X. Shen, H. Lei, T. Xie, Y. Zhang, Y. Wu, Carboxyl-Assisted Synthesis of Nitrogen-Doped Graphene Sheets for Supercapacitor Applications, *Nanoscale Res. Lett.*, 10 (2015) 332.
